# Supplementary material for: Visible light induced radical coupling reactions for the synthesis of conventional polycondensates
Source: Royal Society of Chemistry journal article supplement (doi:10.1039/c9py01140d), 2019-01-01
Supplement: c9py01140d1.pdf [file c9py01140d1.pdf]

## Supporting Information

### Visible Light Induced Radical Coupling Reactions for the Synthesis of Conventional Polycondensates

Busra Nakipoglu,<sup>a</sup> Gorkem Yilmaz,<sup>a,\*</sup> and Yusuf Yagci,<sup>a,b,\*</sup>

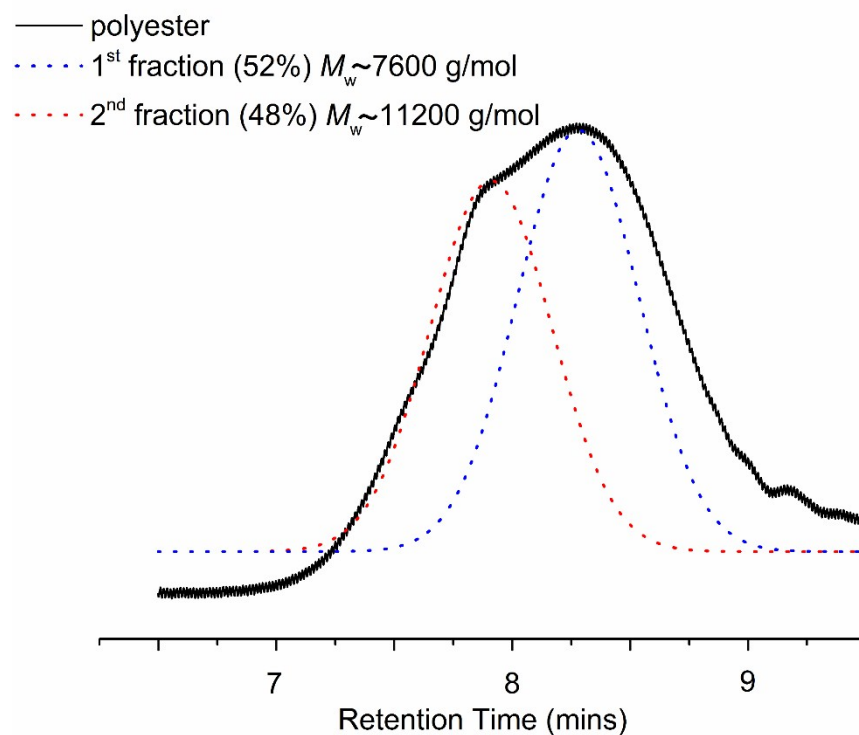

SF1. Deconvoluted GPC trace of the polyester

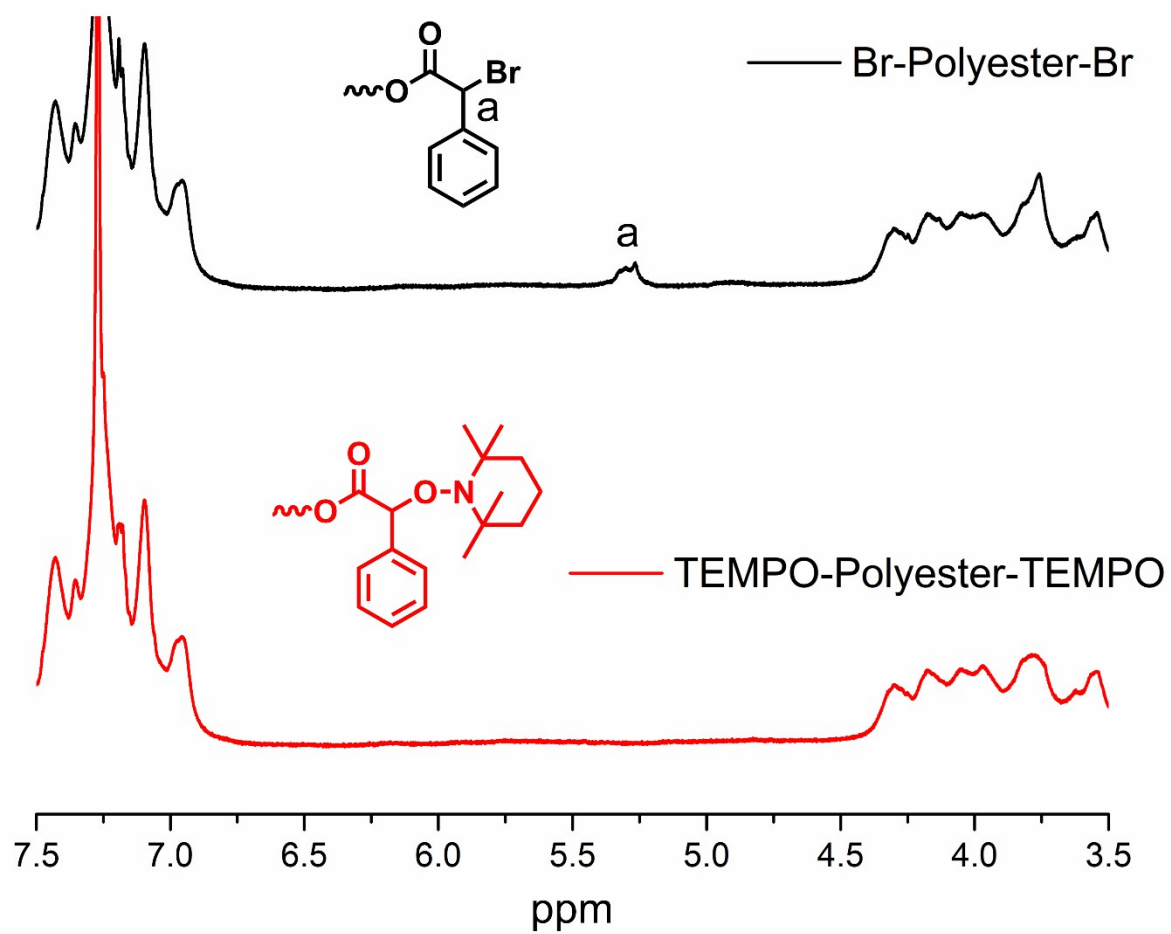

SF2. <sup>1</sup>H NMR spectra of Br-Polyester-Br and TEMPO-Polyester-TEMPO
